# Supplementary material for: A synergistic vertical graphene skeleton and S–C shell to construct high-performance TiNb2O7-based core/shell arrays
Source: Royal Society of Chemistry journal article supplement (doi:10.1039/c8ta06858e), 2018-01-01
Supplement: c8ta06858e1.pdf [file c8ta06858e1.pdf]

## Electronic Supplementary Information

### Synergistic Vertical Graphene Skeleton and S-C shell to Construct High-performance $\text{TiNb}_2\text{O}_7$ -based Core/Shell Arrays

*Shenghui Shen,<sup>a</sup> Weihao Guo,<sup>a</sup> Dong Xie,<sup>b</sup> Yadong Wang,<sup>c</sup> Shengjue Deng,<sup>a</sup> Yu Zhong,<sup>a</sup>  
Xiuli Wang,<sup>a</sup> Xinhui Xia,<sup>\*a</sup> Jiangping Tu<sup>a</sup>*

<sup>a</sup>State key Laboratory of Silicon Materials, Key Laboratory of Advanced Materials and Applications for Batteries of Zhejiang Province, School of Materials Science & Engineering, Zhejiang University, Hangzhou 310027, China. E-mail: helloxxh@zju.edu.cn;

<sup>b</sup>Guangdong Engineering and Technology Research centre for Advanced Nanomaterials, School of Environment and Civil Engineering, Dongguan University of Technology, Dongguan 523808, China.

<sup>c</sup>School of Engineering, Nanyang Polytechnic, 569830, Singapore

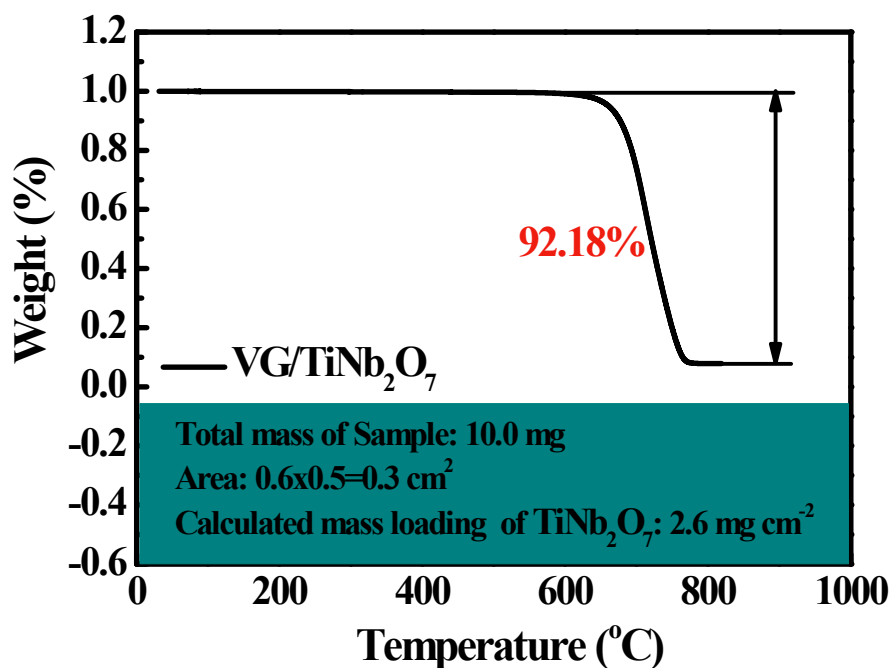

**Fig. S1** Thermogravimetric curve of the VG/TiNb<sub>2</sub>O<sub>7</sub> electrode.

For the TG test, the adopted VG/TiNb<sub>2</sub>O<sub>7</sub> sample had a total weight of 10.0 mg with a size of ~0.3 cm<sup>2</sup>. According to the TG data, the TiNb<sub>2</sub>O<sub>7</sub> accounted for about 7.82 wt. %. Thus, the mass loading of TiNb<sub>2</sub>O<sub>7</sub> was ~2.6 mg cm<sup>-2</sup>.

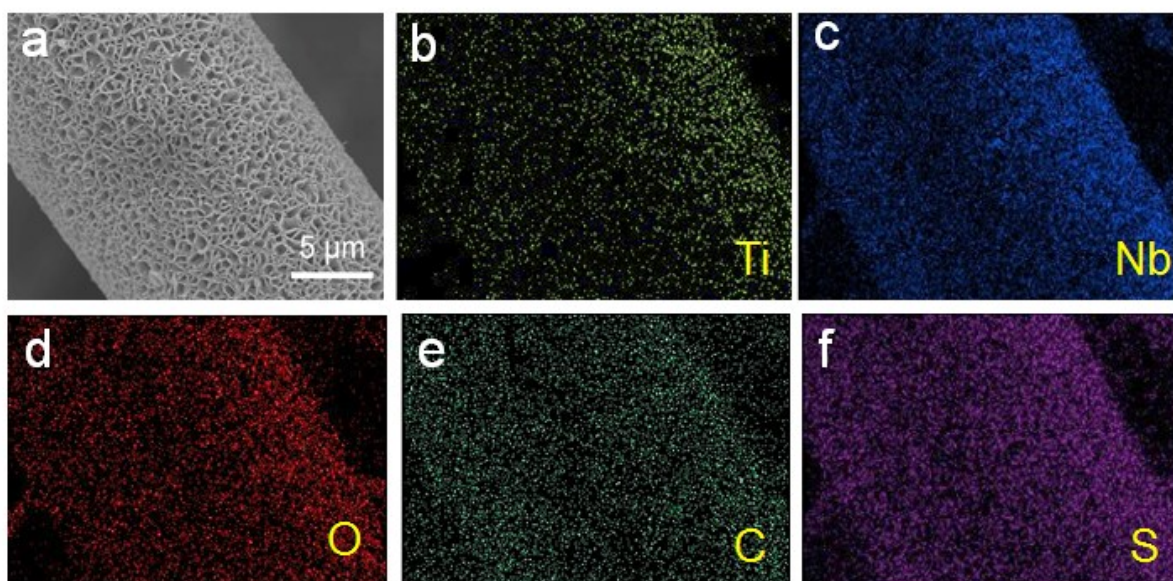

**Fig. S2** EDS elemental mapping images of Ti, Nb, O, C, S for VG/TiNb<sub>2</sub>O<sub>7</sub>@S-C arrays.

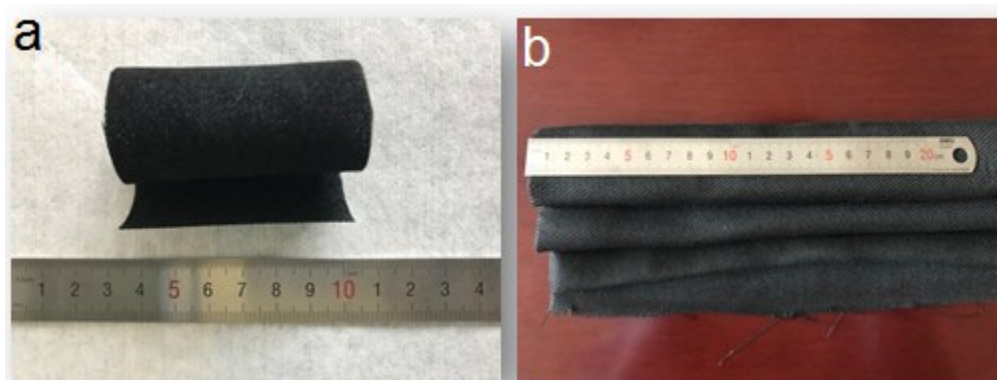

**Fig. S3** Photos of VG/TiNb<sub>2</sub>O<sub>7</sub>@S-C electrodes with different sizes.

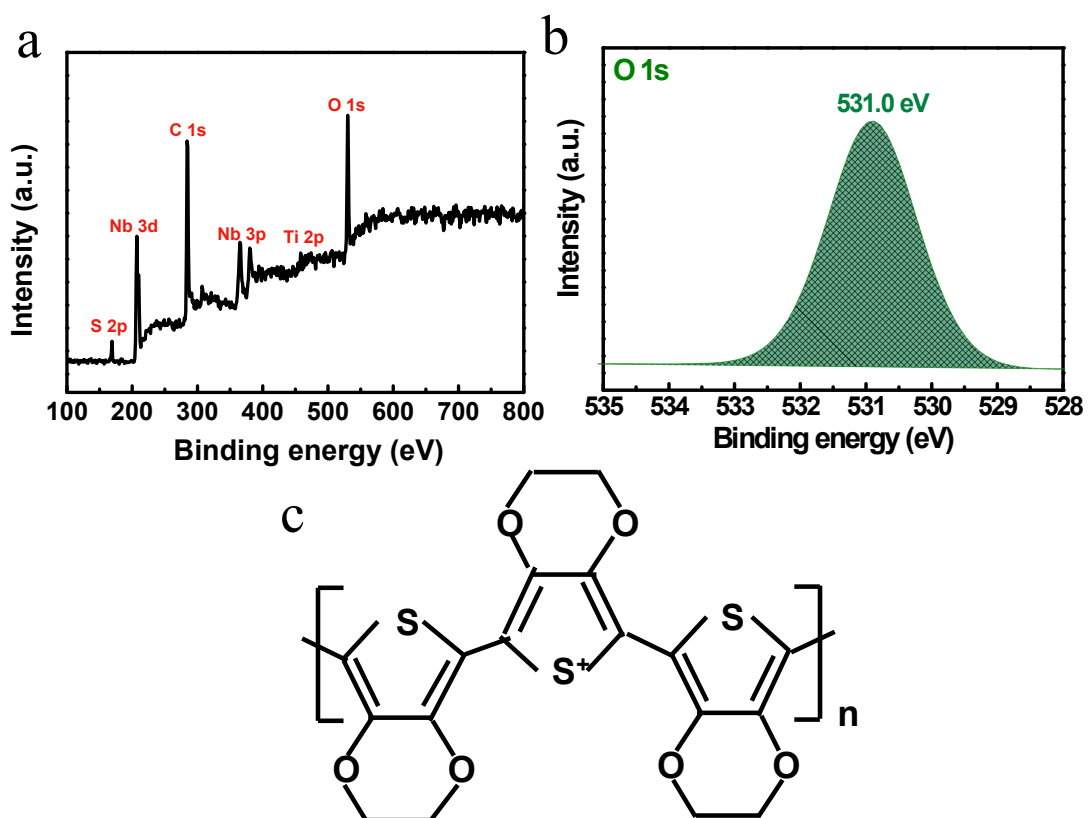

**Fig. S4** XPS spectra: (a) Wide-scan survey spectrum, (b) O 1s spectrum of VG/TiNb<sub>2</sub>O<sub>7</sub>@S-C arrays. (c) Molecular structural formula of PEDOT.

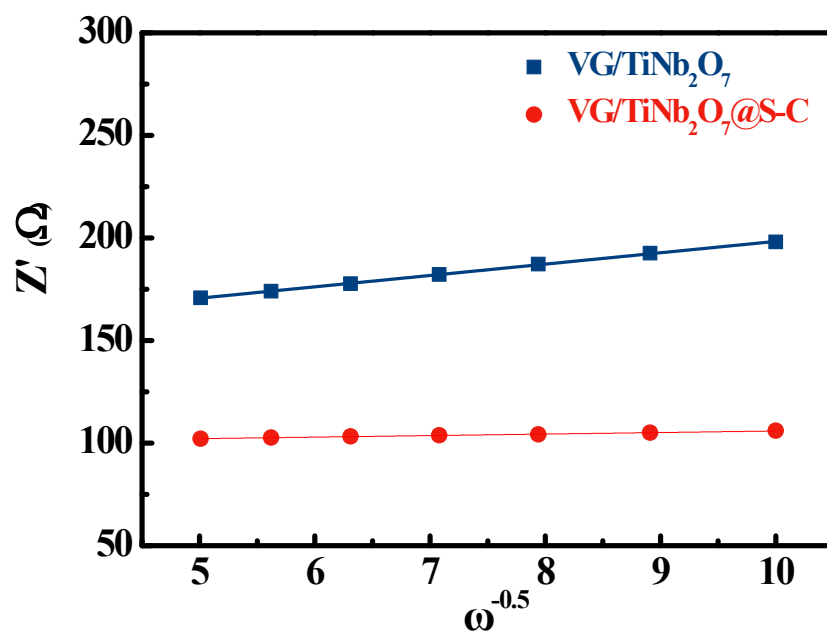

**Fig. S5**  $Z_0-\omega^{-0.5}$  plots of VG/TiNb<sub>2</sub>O<sub>7</sub> and VG/TiNb<sub>2</sub>O<sub>7</sub>@S-C samples in the low frequency range at room temperature.

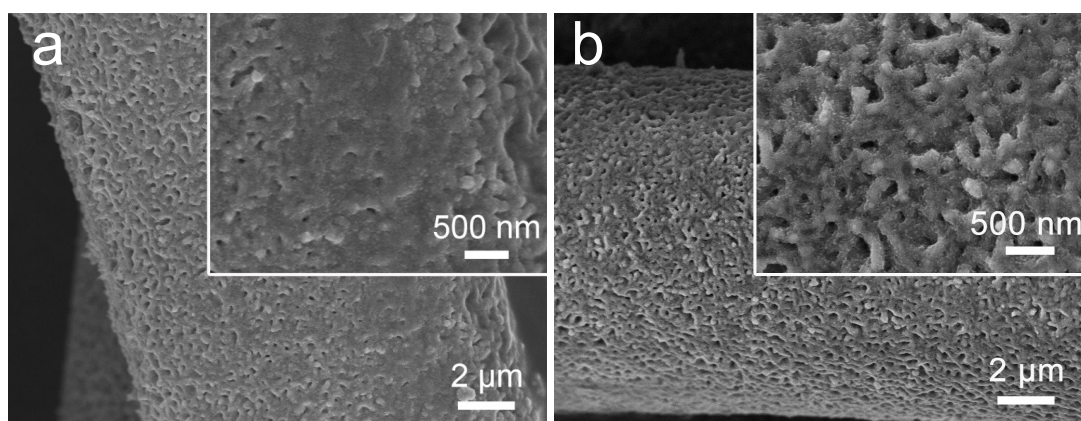

**Fig. S6** SEM images after 5000 cycles at 10C: (a) VG/TiNb<sub>2</sub>O<sub>7</sub> and (b) VG/TiNb<sub>2</sub>O<sub>7</sub>@S-C arrays at 25 °C.

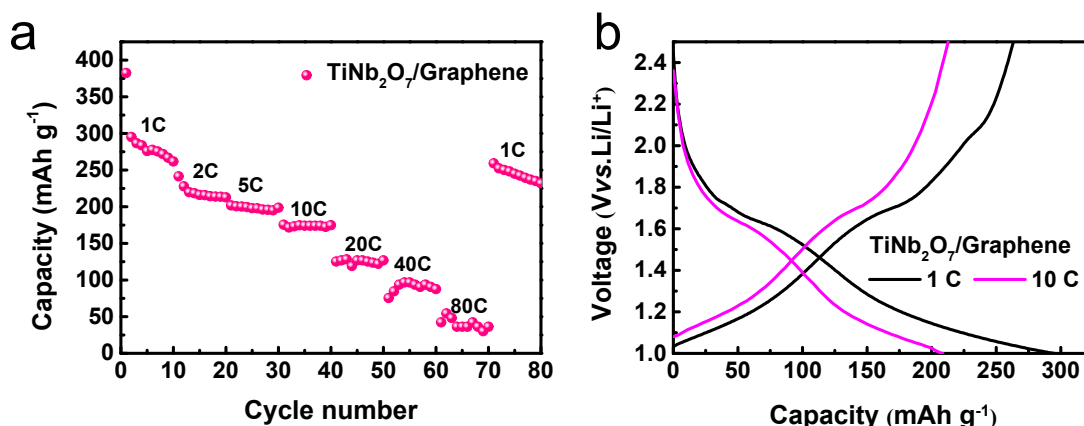

**Fig. S7** Electrochemical properties of TiNb<sub>2</sub>O<sub>7</sub>/Graphene electrode: (a) Rate capacities and (b) Charge/discharge profiles at 1 C and 10 C.

The TiNb<sub>2</sub>O<sub>7</sub>/Graphene electrodes deliver capacities of 280 mAh g<sup>-1</sup> at 1 C and 50 mAh g<sup>-1</sup> at 80 C, respectively. The capacity of the TiNb<sub>2</sub>O<sub>7</sub>/Graphene electrodes can be recovered to 250 mAh g<sup>-1</sup> at 1 C.

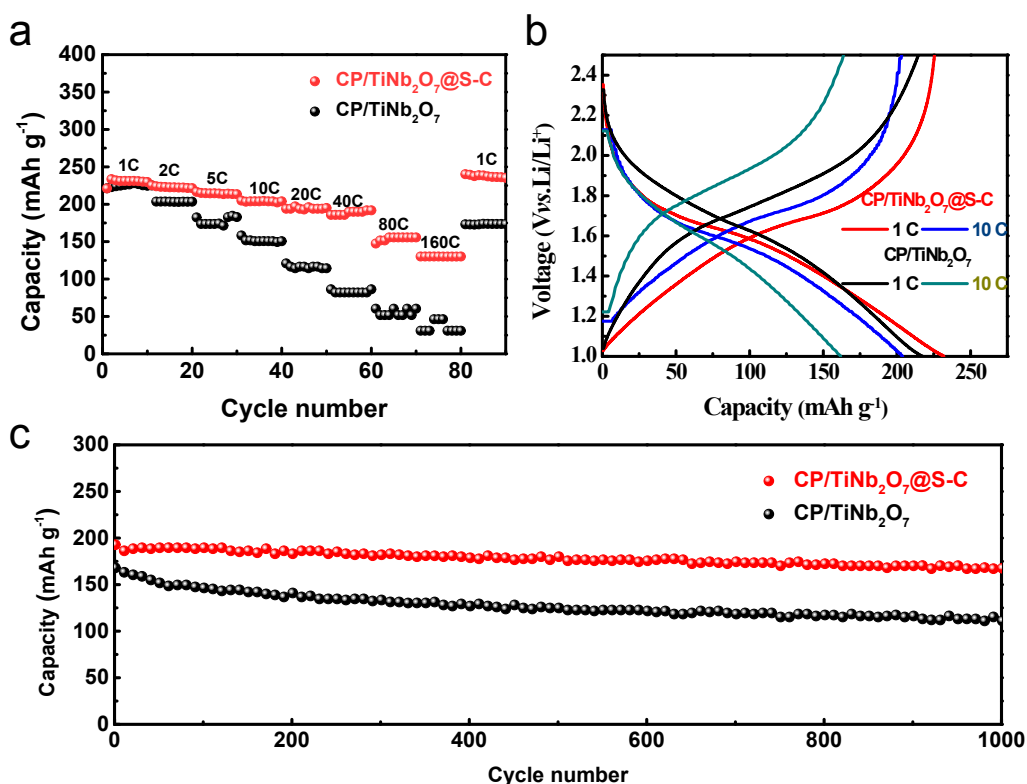

**Fig. S8** Electrochemical properties of CP/TiNb<sub>2</sub>O<sub>7</sub> and CP/TiNb<sub>2</sub>O<sub>7</sub>@S-C electrodes: (a) Rate capacities; (b) Charge/discharge profiles at 1 C and 10 C; (c) Cycling stability at 10 C.

The CP/TiNb<sub>2</sub>O<sub>7</sub>@S-C electrode shows rate performance with a capacity of 230 mAh g<sup>-1</sup> at 1 C and 130 mAh g<sup>-1</sup> at 10 C and cycling life with a capacity of 167 mAh g<sup>-1</sup> at 10 C after 1000 cycles. Apparently, the CP/TiNb<sub>2</sub>O<sub>7</sub>@S-C electrodes exhibit higher rate performance and cycling performance than the CP/TiNb<sub>2</sub>O<sub>7</sub> counterpart. But the overall electrochemical properties of CP/TiNb<sub>2</sub>O<sub>7</sub>@S-C electrodes are lower than those of the VG/TiNb<sub>2</sub>O<sub>7</sub>@S-C electrodes in this work.

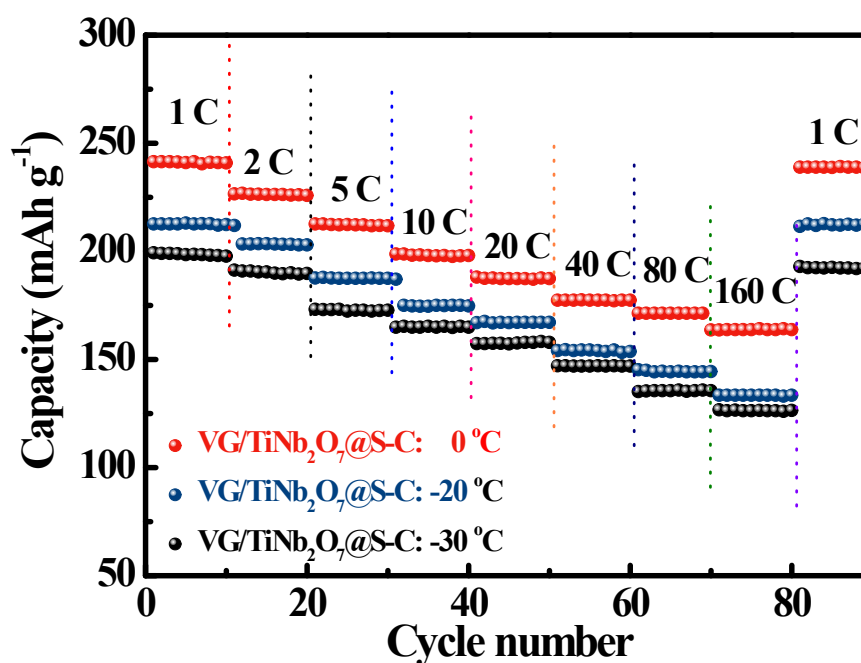

**Fig. S9** Rate performance of the VG/TiNb<sub>2</sub>O<sub>7</sub>@S-C electrode at low temperature from 0 to -30 °C.

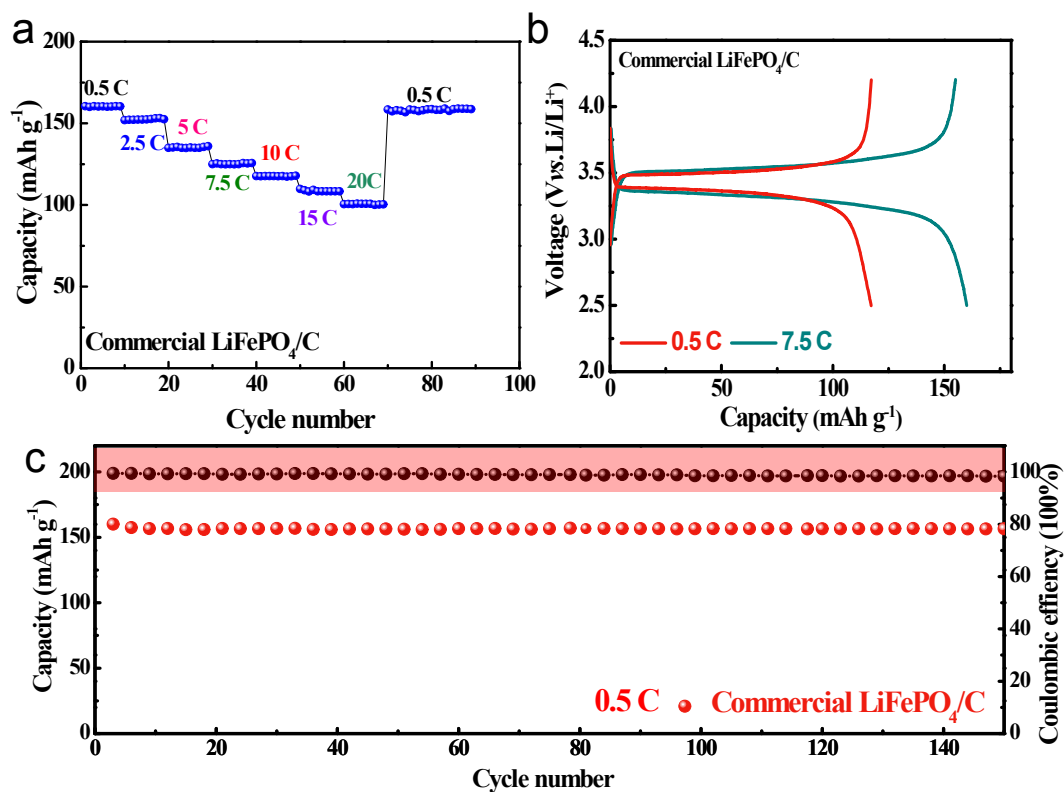

**Fig. S10** Electrochemical properties of commercial  $\text{LiFePO}_4/\text{C}$  cathode: (a) Rate capacities, (b) Charge/discharge profiles at 0.5 C and 7.5 C, (c) cycling stability at 0.5C.

The commercial  $\text{LiFePO}_4/\text{C}$  cathode shows good electrochemical performance with a capacity of 161  $\text{mAh g}^{-1}$  at 0.5 C and 119  $\text{mAh g}^{-1}$  at 10 C, respectively, as well as good cycling life with a capacity of 156  $\text{mAh g}^{-1}$  at 0.5 C after 150 cycles.

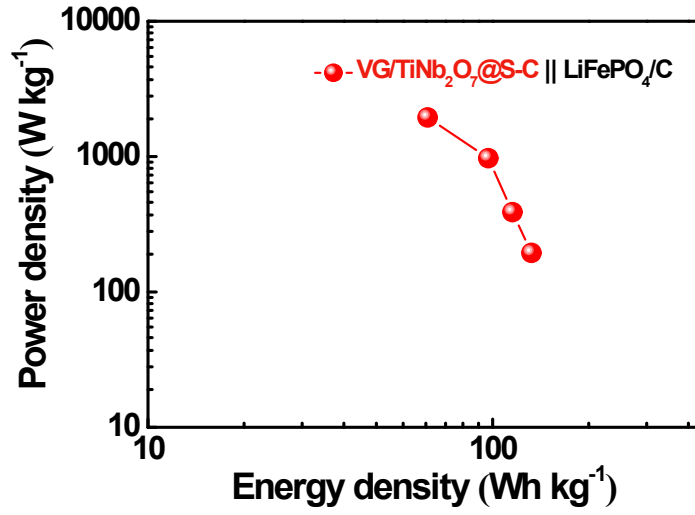

Fig. S11 Ragone plot of the VG/TiNb<sub>2</sub>O<sub>7</sub>@S-C//LiFePO<sub>4</sub> full cell.

**Table S1.** Simulated EIS results of VG/TiNb<sub>2</sub>O<sub>7</sub> and VG/TiNb<sub>2</sub>O<sub>7</sub>@S-C arrays at room temperature (25 °C).

| Electrode                                | Temperature/°C | R <sub>s</sub> (Ω) | R <sub>f</sub> (Ω) | R <sub>ct</sub> (Ω) | D <sub>Li</sub> (Ω)    |
|------------------------------------------|----------------|--------------------|--------------------|---------------------|------------------------|
| VG/TiNb <sub>2</sub> O <sub>7</sub>      | 25             | 6.2                | 43.2               | 90.5                | 3.08×10 <sup>-18</sup> |
| VG/TiNb <sub>2</sub> O <sub>7</sub> @S-C | 25             | 5.4                | 35.9               | 35.5                | 1.59×10 <sup>-16</sup> |



**Table S2.** Rate comparison with other TiNb<sub>2</sub>O<sub>7</sub>-based electrodes

| <b>Electrodes</b>                                                    | <b>Current density</b> | <b>Specific capacity</b> | <b>Ref.</b>      |
|----------------------------------------------------------------------|------------------------|--------------------------|------------------|
| “Nano-Pearl-String” TiNb <sub>2</sub> O <sub>7</sub>                 | 10 C                   | 140                      | 1                |
| nanostructured TiNb <sub>2</sub> O <sub>7</sub>                      | 50 C                   | 83.9                     | 2                |
| TiCr <sub>0.5</sub> Nb <sub>10.5</sub> O <sub>29</sub> /CNTs         | 20 C                   | 206                      | 3                |
| TiNb <sub>2</sub> O <sub>7</sub> /C microspheres                     | 30 C                   | 120                      | 4                |
| Nitridated PTNO (NPTNO)                                              | 100 C                  | 143                      | 5                |
| TiNb <sub>2</sub> O <sub>7</sub> Nanospheres                         | 50 C                   | 167                      | 6                |
| Ru <sub>0.01</sub> Ti <sub>0.99</sub> Nb <sub>2</sub> O <sub>7</sub> | 5 C                    | 181                      | 7                |
| 3DOM-TiNb <sub>2</sub> O <sub>7</sub>                                | 100 C                  | 99                       | 8                |
| TiNb <sub>2</sub> O <sub>7</sub> nanotubes                           | 50 C                   | 230                      | 9                |
| TiNb <sub>2</sub> O <sub>7</sub> hollow nanofiber                    | 10 C                   | 158.4                    | 10               |
| Mo- TiNb <sub>2</sub> O <sub>7</sub>                                 | 100 C                  | 180                      | 11               |
| <b>VG/TiNb<sub>2</sub>O<sub>7</sub>@S-C</b>                          | <b>160 C</b>           | <b>182</b>               | <b>This work</b> |

**Table S3.** Comparison of the decay rate of other TiNb<sub>2</sub>O<sub>7</sub>-based electrodes

| <b>Electrodes</b>                                                    | <b>Current density</b> | <b>Decay rate<br/>(per cycle)</b> | <b>Ref.</b>      |
|----------------------------------------------------------------------|------------------------|-----------------------------------|------------------|
| Nano-Pearl-String TiNb <sub>2</sub> O <sub>7</sub>                   | 1 C                    | 0.16%                             | 1                |
| Nanostructured TiNb <sub>2</sub> O <sub>7</sub>                      | 10 C                   | 0.078%                            | 2                |
| TiCr <sub>0.5</sub> Nb <sub>10.5</sub> O <sub>29</sub> /CNTs         | 10 C                   | 0.05%                             | 3                |
| TiNb <sub>2</sub> O <sub>7</sub> /C composite<br>microspheres        | 5 C                    | 0.11%                             | 4                |
| Nitridated PTNO (NPTNO)                                              | 5 C                    | 0.01%                             | 5                |
| TiNb <sub>2</sub> O <sub>7</sub> Nanospheres                         | 5 C                    | 0.0036%                           | 6                |
| Ru <sub>0.01</sub> Ti <sub>0.99</sub> Nb <sub>2</sub> O <sub>7</sub> | 5 C                    | 0.099%                            | 7                |
| 3DOM-TiNb <sub>2</sub> O <sub>7</sub>                                | 10 C                   | 0.018%                            | 8                |
| TiNb <sub>2</sub> O <sub>7</sub> nanotubes                           | 1 C                    | 0.02%                             | 9                |
| TiNb <sub>2</sub> O <sub>7</sub> hollow nanofiber                    | 10 C                   | 0.021%                            | 10               |
| TiNb <sub>2</sub> O <sub>7</sub> nanorods                            | 10 C                   | 0.09%                             | 12               |
| V- TiNb <sub>2</sub> O <sub>7</sub>                                  | 10 C                   | 1.07%                             | 13               |
| <b>VG/TiNb<sub>2</sub>O<sub>7</sub>@S-C</b>                          | <b>40 C</b>            | <b>1.09%</b>                      | <b>This work</b> |

**Table S4.** Rate capacities of CP/TiNb<sub>2</sub>O<sub>7</sub> and CP/TiNb<sub>2</sub>O<sub>7</sub>/S-C electrodes

| Electrode                                | 1 C                 | 2 C | 5 C | 10 C | 20 C | 40 C | 80 C | 160 C |
|------------------------------------------|---------------------|-----|-----|------|------|------|------|-------|
|                                          | mAh g <sup>-1</sup> |     |     |      |      |      |      |       |
| CP/TiNb <sub>2</sub> O <sub>7</sub>      | 224                 | 203 | 173 | 150  | 116  | 82   | 52   | 31    |
| CP/TiNb <sub>2</sub> O <sub>7</sub> @S-C | 230                 | 222 | 214 | 204  | 194  | 185  | 155  | 130   |
| VG/TiNb <sub>2</sub> O <sub>7</sub> @S-C | 284                 | 272 | 260 | 248  | 238  | 224  | 205  | 181   |

**Table S5.** Rate capacities of VG/TiNb<sub>2</sub>O<sub>7</sub>@S-C electrode at different temperatures

| Electrode                                | T/°C | 1 C                 | 2 C | 5 C | 10 C | 20 C | 40 C | 80 C | 160 C |
|------------------------------------------|------|---------------------|-----|-----|------|------|------|------|-------|
|                                          |      | mAh g <sup>-1</sup> |     |     |      |      |      |      |       |
| VG/TiNb <sub>2</sub> O <sub>7</sub> @S-C | 25   | 284                 | 272 | 260 | 248  | 238  | 224  | 205  | 181   |
|                                          | 50   | 338                 | 323 | 297 | 279  | 265  | 243  | 229  | 211   |
|                                          | 70   | 354                 | 333 | 313 | 291  | 276  | 261  | 252  | 241   |

**Table S6.** Simulated EIS results of the VG/TiNb<sub>2</sub>O<sub>7</sub>@S-C at medium-high temperature.

| Sample                                   | T/°C | R <sub>s</sub> (Ω) | R <sub>f</sub> (Ω) | R <sub>ct</sub> (Ω) | D <sub>Li</sub> (Ω)    |
|------------------------------------------|------|--------------------|--------------------|---------------------|------------------------|
| VG/TiNb <sub>2</sub> O <sub>7</sub> @S-C | 25   | 5.4                | 35.9               | 35.5                | 1.59×10 <sup>-16</sup> |
|                                          | 50   | 3.5                | 8.6                | 26.7                | 2.80×10 <sup>-16</sup> |
|                                          | 70   | 3.0                | 3.9                | 20.7                | 1.88×10 <sup>-16</sup> |

## References

- [1] K. Tang, X. Mu, P. A. van Aken, Y. Yu and J. Maier, *Adv Energy Mater*, 2013, 3, 49-53.
- [2] S. Lou, Y. Ma, X. Cheng, J. Gao, Y. Gao, P. Zuo, C. Du and G. Yin, *Chem Commun* 2015, 51, 17293-17296.
- [3] L. Hu, R. Lu, L. Tang, R. Xia, C. Lin, Z. Luo, Y. Chen and J. Li, *J Alloys Compd*, 2018, 732, 116-123.
- [4] G. Zhu, Q. Li, Y. Zhao and R. Che, *ACS Appl Mater Interfaces*, 2017, 9, 41258-41264.
- [5] H. Park, H. B. Wu, T. Song, X. W. David Lou, U. Paik, *Adv. Energy Mater.* 2015, 5, 1401945.
- [6] Q. Cheng, J. Liang, Y. Zhu, L. Si, C. Guo and Y. Qian, *J Mater Chem A*, 2014, 2, 17258-17262.
- [7] C. Lin, S. Yu, S. Wu, S. Lin, Z.-Z. Zhu, J. Li and L. Lu, *J Mater ChemA*, 2015, 3, 8627-8635.
- [8] L. Fei, Y. Xu, X. Wu, Y. Li, P. Xie, S. Deng, S. Smirnov and H. Luo, *Nanoscale*, 2013, 5, 11102-11107.
- [9] S. Lou, X. Cheng, Y. Zhao, A. Lushington, J. Gao, Q. Li, P. Zuo, B. Wang, Y. Gao, Y. Ma, C. Du, G. Yin and X. Sun, *Nano Energy*, 2017, 34, 15-25.
- [10] H. Park, D. H. Shin, T. Song, W. I. Park and U. Paik, *J Mater ChemA*, 2017, 5, 6958-6965.
- [11] H. Yu, H. Lan, L. Yan, S. Qian, X. Cheng, H. Zhu, N. Long, M. Shui and J. Shu, *Nano Energy*, 2017, 38, 109-117.
- [12] H. Song and Y.-T. Kim, *Chem Commun* 2015, 51, 9849-9852.

[13] X. Wen, C. Ma, C. Du, J. Liu, X. Zhang, D. Qu and Z. Tang, *Electrochim Acta*, 2015, 186, 58-63.
